# Supplementary material for: Population Status and Threats to Galliform Bird in the Arjo-Didessa River Valley, Southwestern Ethiopia
Source: Hindawi journal article supplement (doi:10.1155/2023/5730010), 2023-07-03
Supplement: f1 [file 5730010.f1.zip]

Archive with 2 entries (2 files):
- Supplementary file - 5730010 - Fig S1.docx
- Supplementary file - 5730010 - Fig S2.docx
