# Supplementary figures and images for: Population Status and Threats to Galliform Bird in the Arjo-Didessa River Valley, Southwestern Ethiopia
Source: Hindawi journal article supplement (doi:10.1155/2023/5730010), 2023-07-03

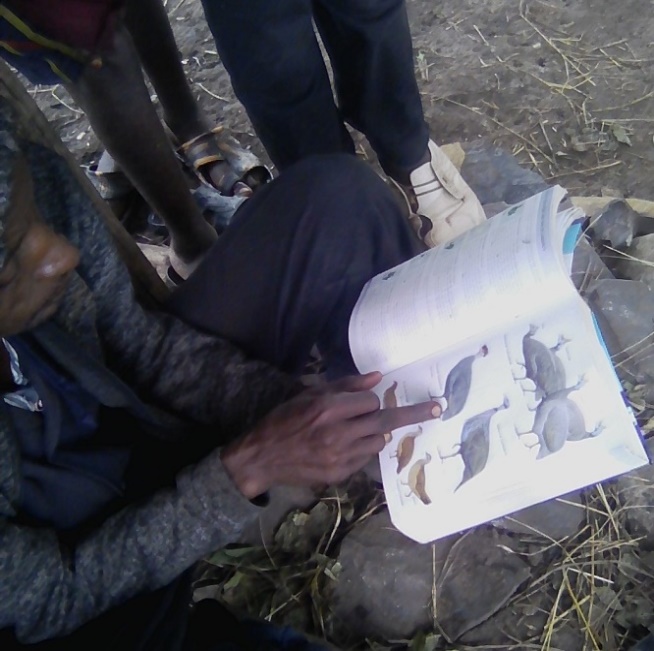

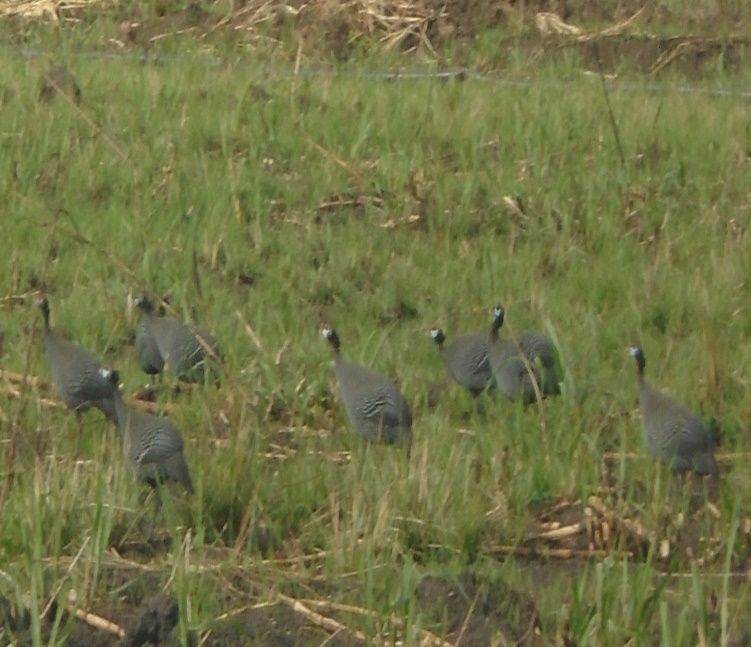


Figure S1. Galliform birds survey and species identification (©Yihenew A., 2019).

Supplement: f1 [file 5730010.f1.zip › Supplementary file - 5730010 - Fig S1.docx]

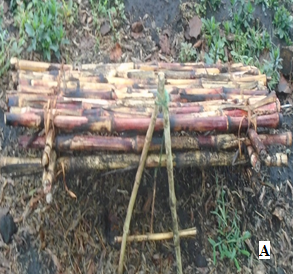

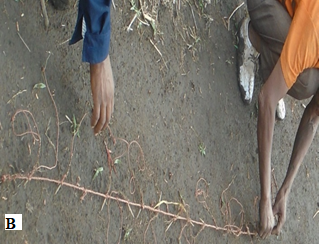


Figure S2. Galliformes hunting practices in the study area: A–Live traps; B–Leg snares (©Yihenew A., 2020).

Supplement: f1 [file 5730010.f1.zip › Supplementary file - 5730010 - Fig S2.docx]
